# Supplementary material for: Polymorphisms in CXCR3 ligands predict early CXCL9 recovery and severe chronic GVHD
Source: PubMed Central journal article supplement (PMC7914250; doi:10.1038/s41408-021-00434-2), 2021-02-27

# Suppl. Figure 1

## CXCL4, CXCL4V1 and CXCL9-11

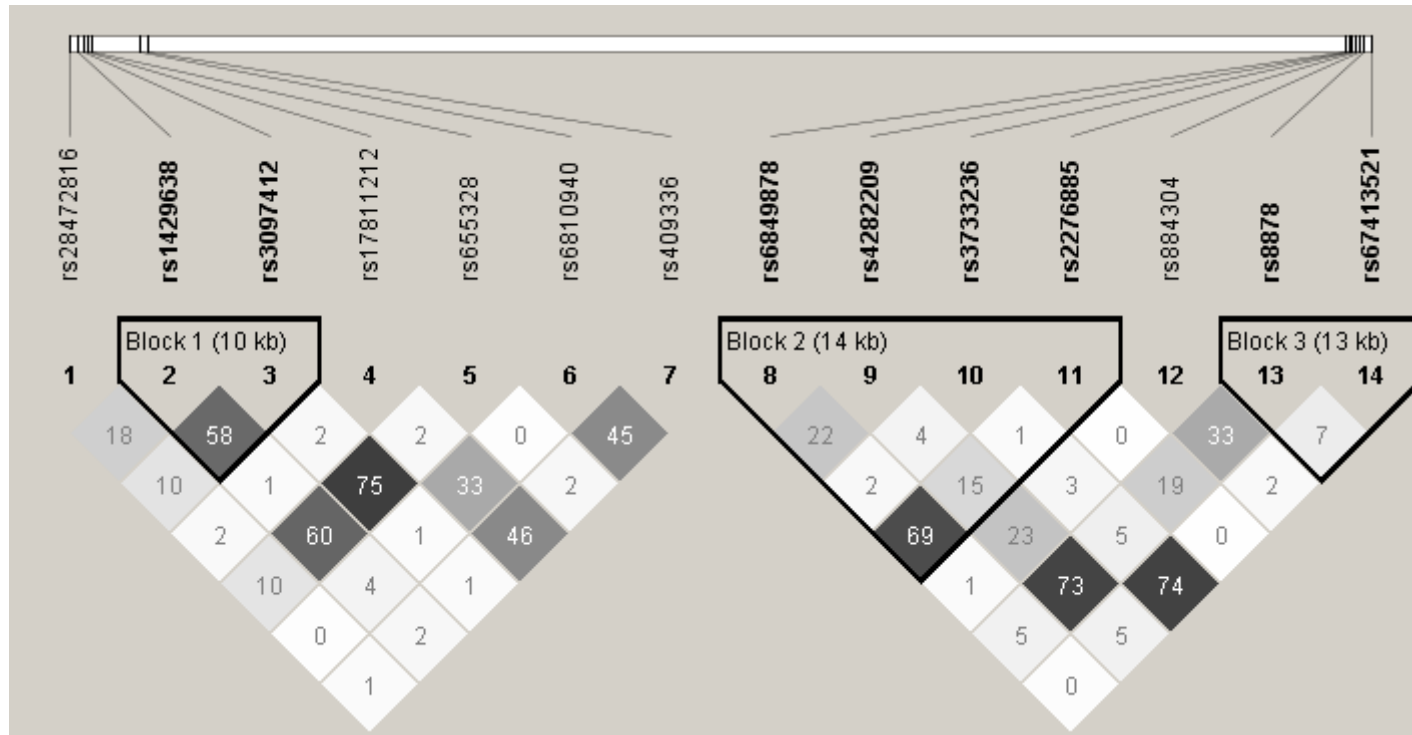

## CXCR3

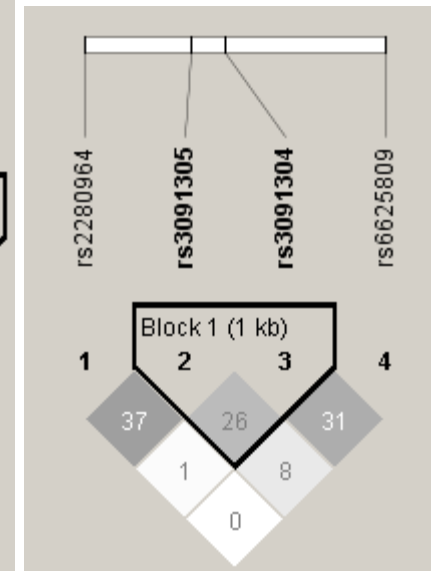

Suppl. Figure 2

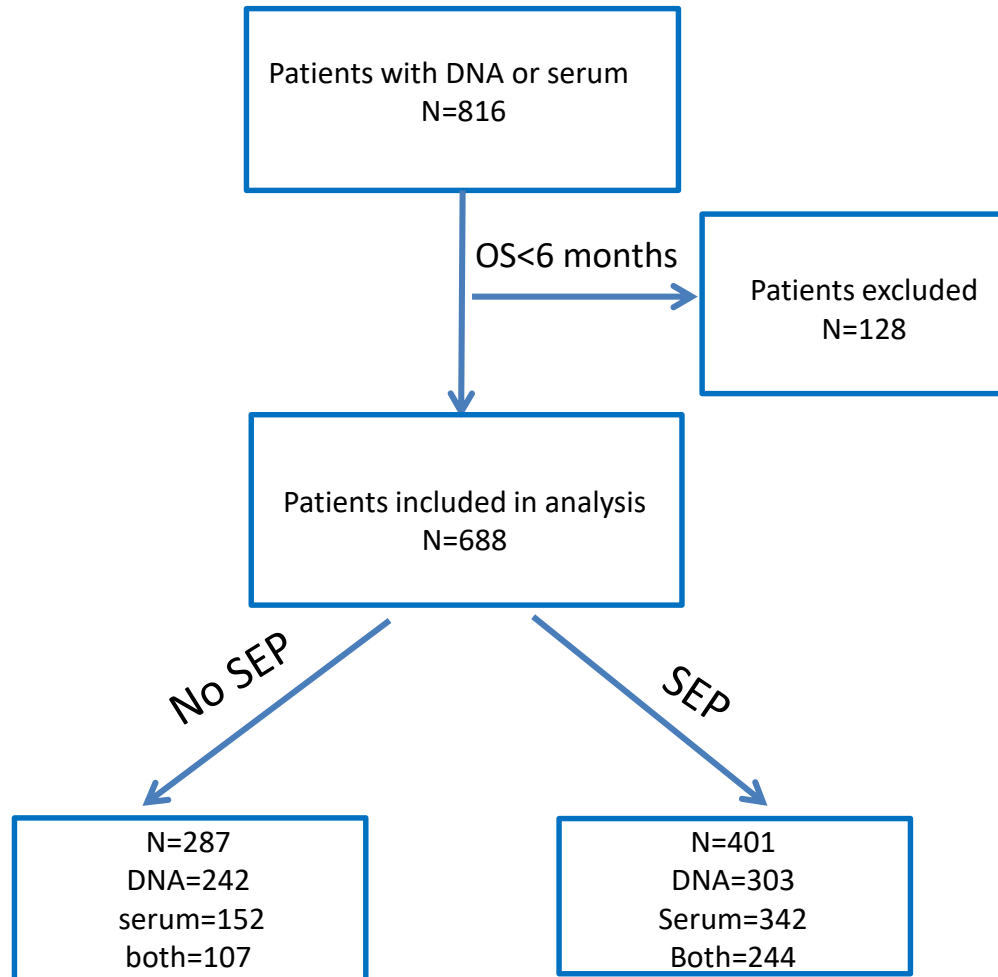

**Abbreviations:**

OS: Overall Survival (month); SEP: statin-based endothelial protection.

Suppl. Figure 3

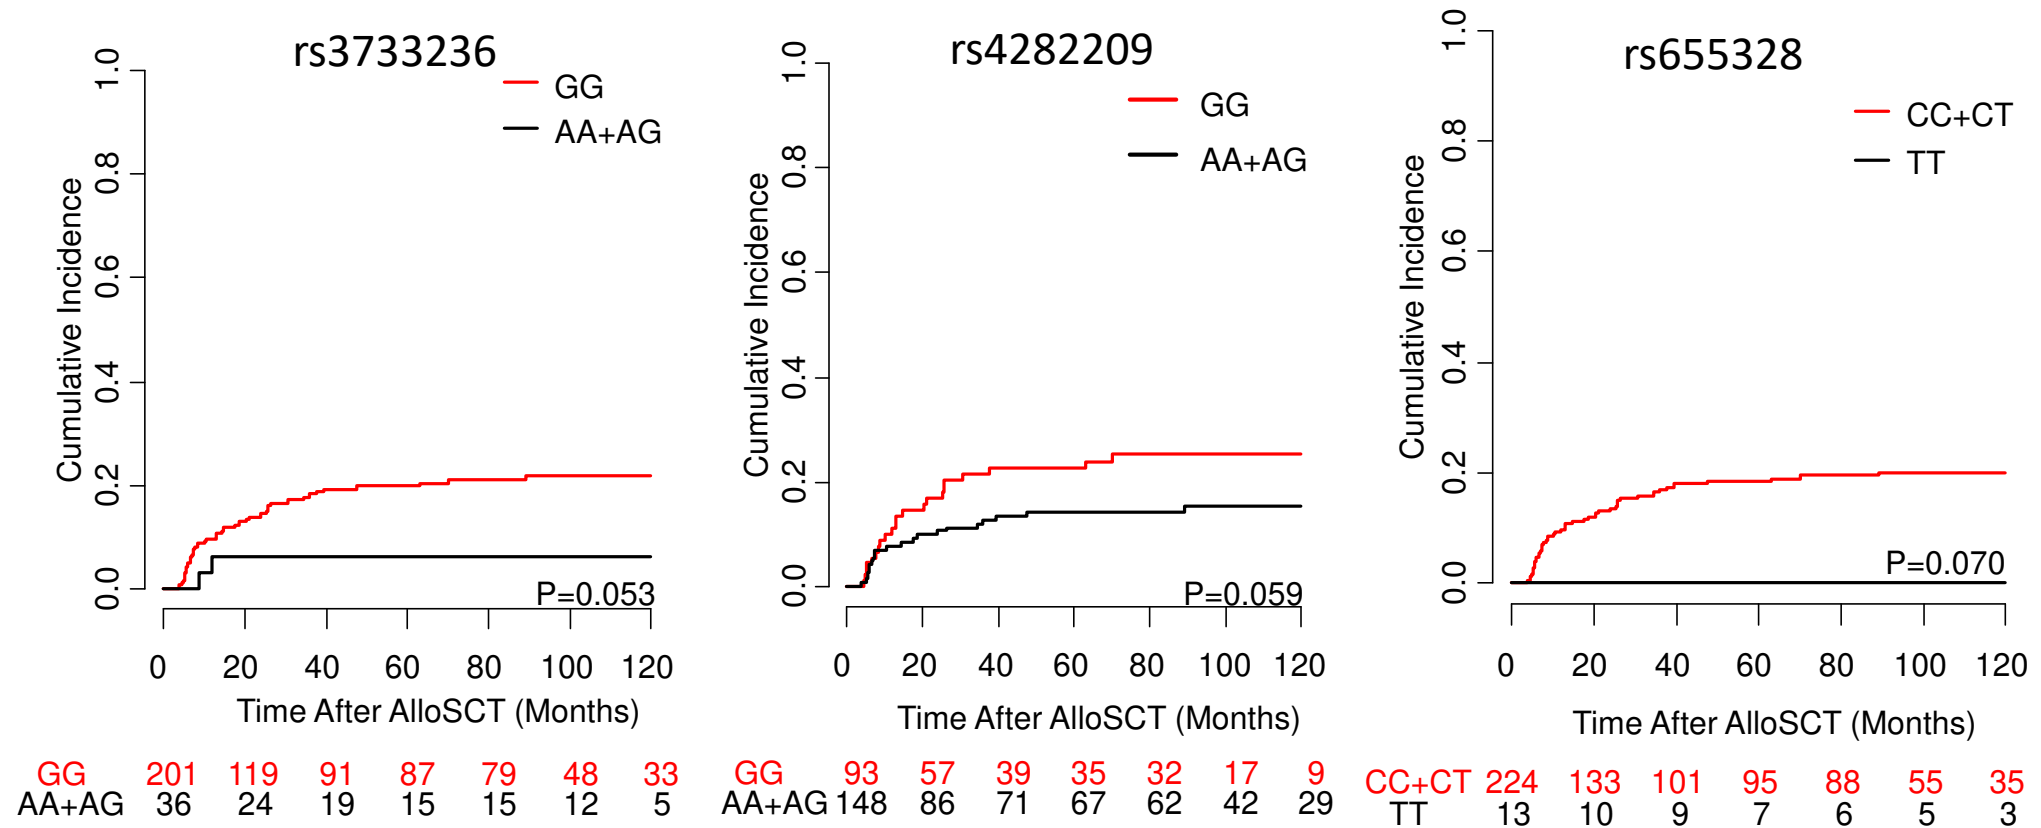

Suppl. Figure 4

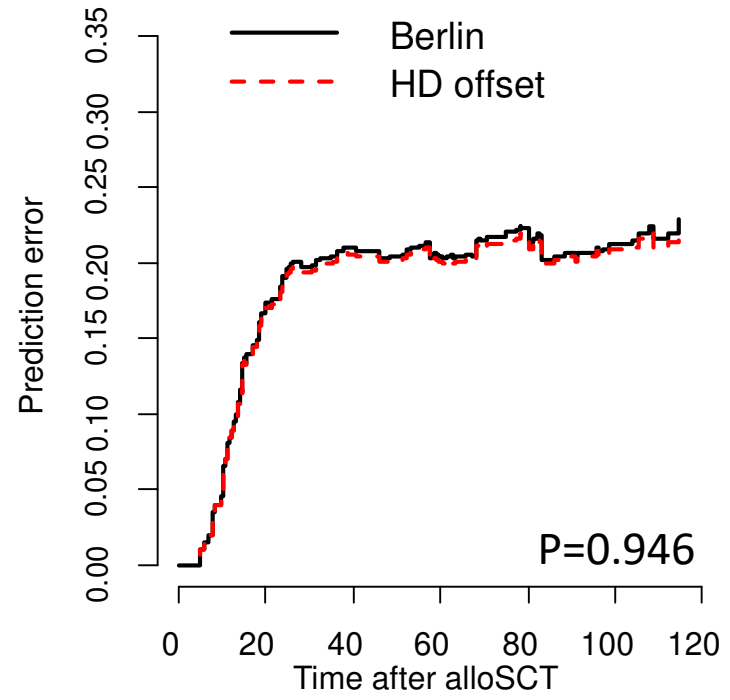

Suppl. Figure 5A

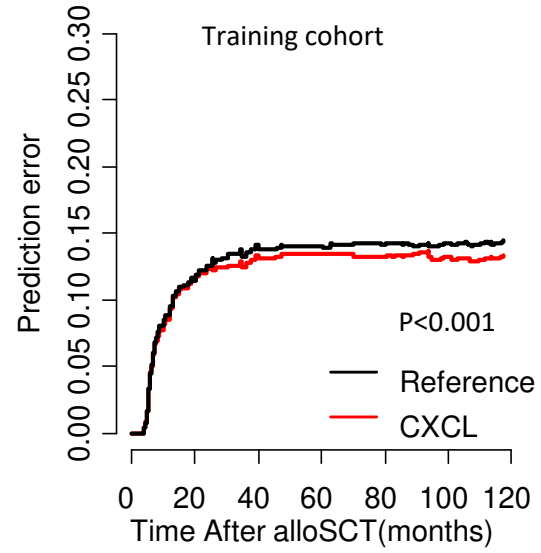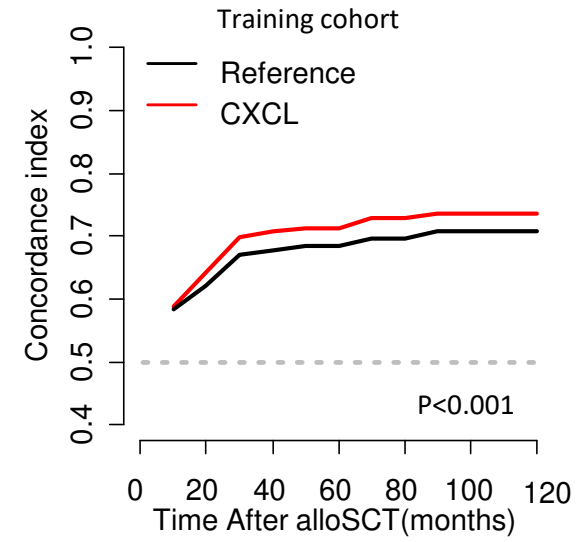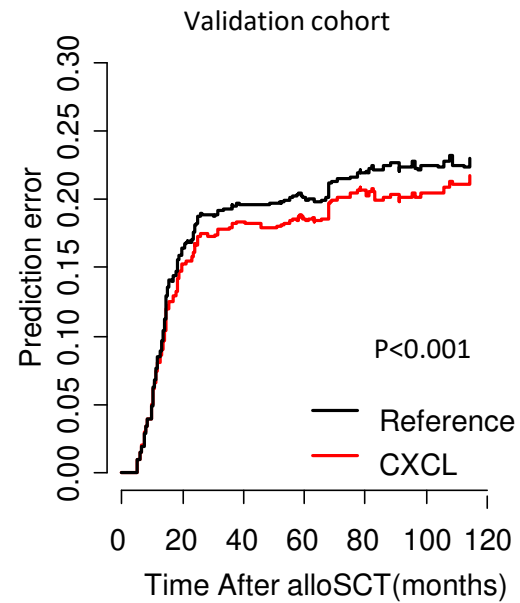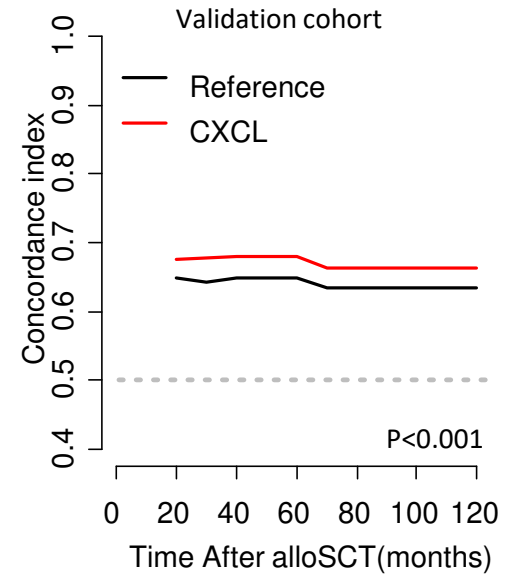

Suppl. Figure 5B

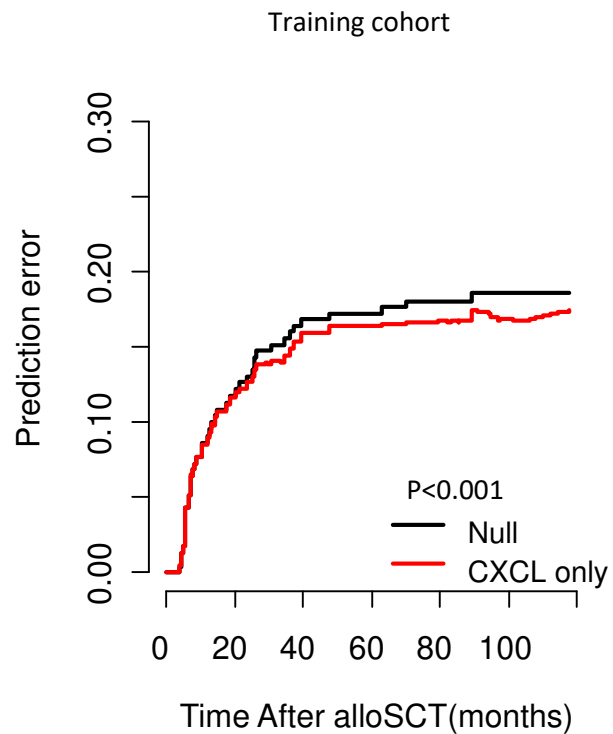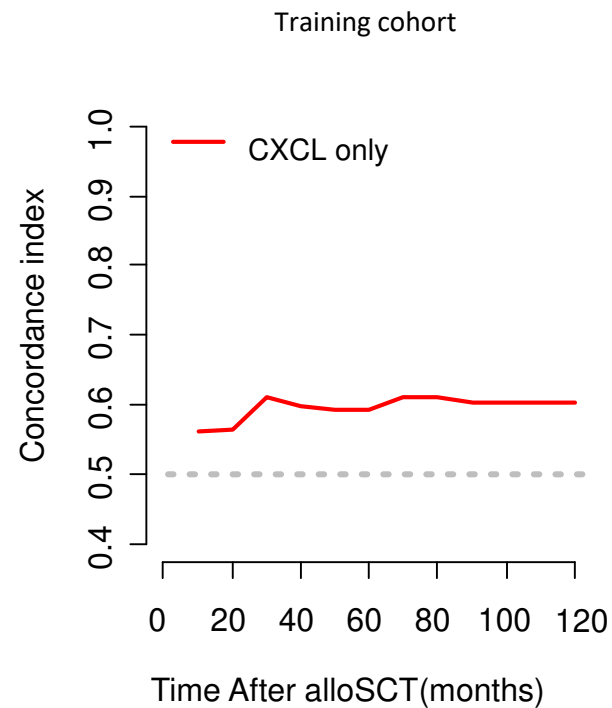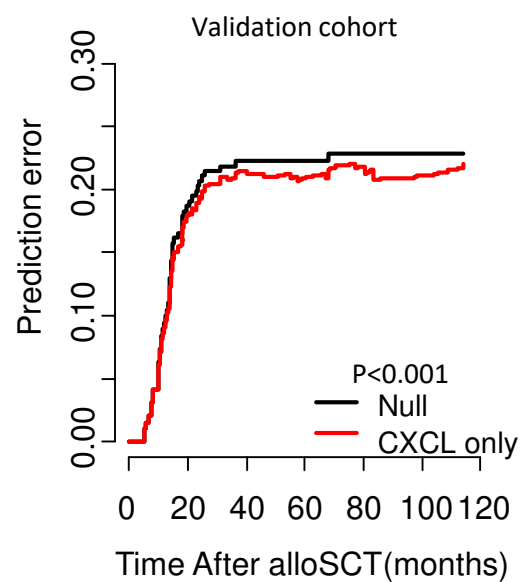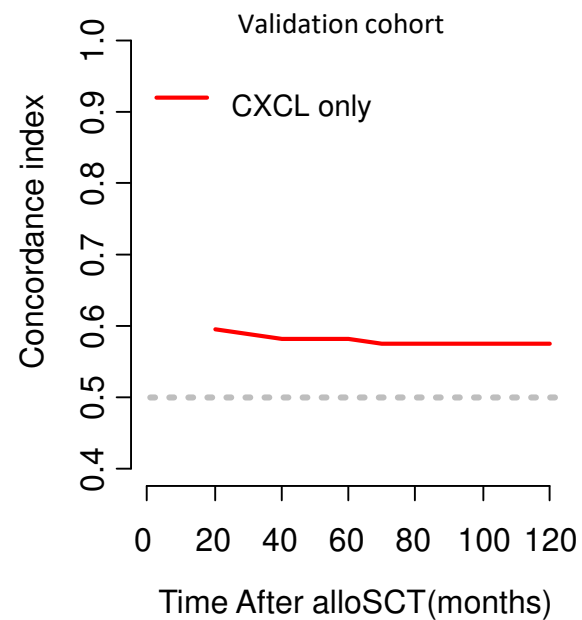

Suppl. Figure 6

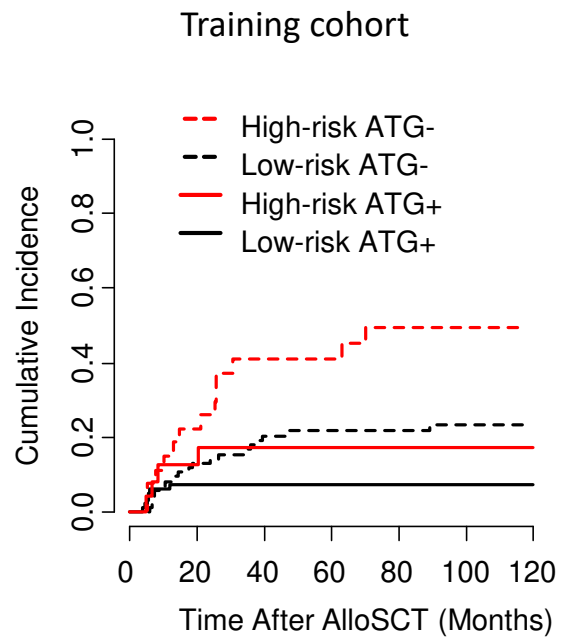

|                |     |    |    |    |    |    |    |
|----------------|-----|----|----|----|----|----|----|
| High-risk ATG- | 27  | 15 | 8  | 7  | 5  | 3  | 2  |
| Low-risk ATG-  | 90  | 50 | 32 | 29 | 27 | 22 | 18 |
| High-risk ATG+ | 25  | 13 | 9  | 9  | 9  | 4  | 4  |
| Low-risk ATG+  | 100 | 66 | 62 | 58 | 54 | 31 | 14 |

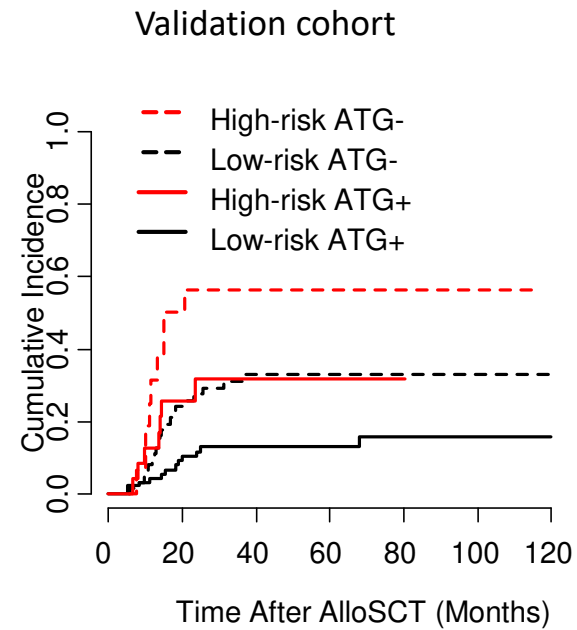

|                |    |    |    |    |    |   |   |
|----------------|----|----|----|----|----|---|---|
| High-risk ATG- | 16 | 5  | 3  | 2  | 2  | 1 | 1 |
| Low-risk ATG-  | 65 | 34 | 18 | 15 | 11 | 7 | 4 |
| High-risk ATG+ | 24 | 11 | 6  | 3  | 1  |   |   |
| Low-risk ATG+  | 97 | 45 | 31 | 22 | 9  | 4 | 2 |

High risk

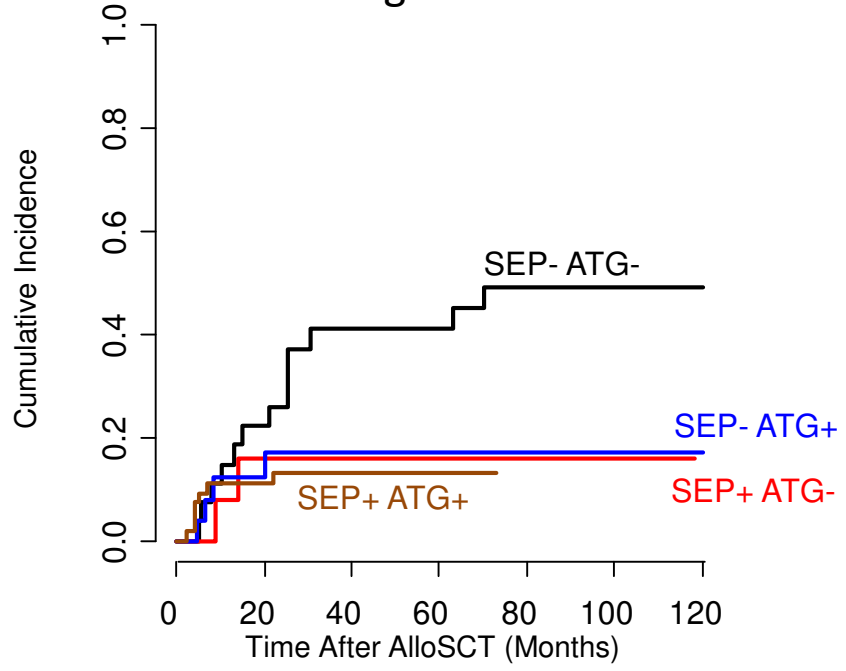

|           |    |    |    |   |   |   |   |
|-----------|----|----|----|---|---|---|---|
| SEP- ATG- | 27 | 15 | 8  | 7 | 5 | 3 | 2 |
| SEP+ ATG- | 14 | 6  | 4  | 2 | 1 | 1 |   |
| SEP- ATG+ | 25 | 13 | 9  | 9 | 9 | 4 | 4 |
| SEP+ ATG+ | 54 | 30 | 19 | 4 |   |   |   |

**5 year cumulative incidence: (95%CI)**

- Statin- ATG-: 41.1% (25.2%-61.9%)
- Statin+ ATG-: 16.1% (4.3%-50.1%)
- Statin- ATG+: 17.1% (6.8%-39.6%)
- Statin+ ATG+: 13.2% (6.5%-25.7%)

Low risk

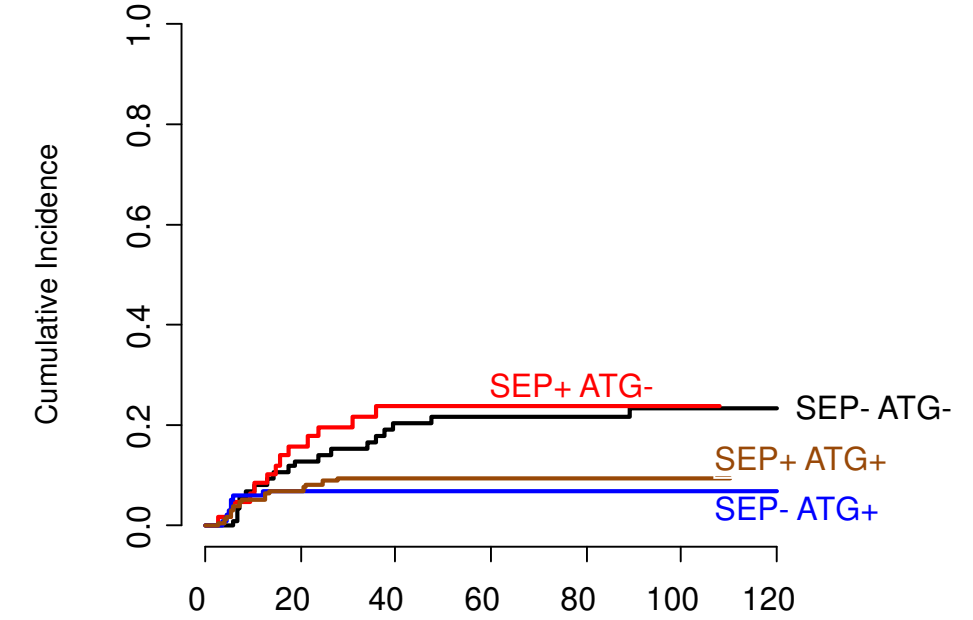

|           |     |     |    |    |    |    |    |
|-----------|-----|-----|----|----|----|----|----|
| SEP- ATG- | 90  | 50  | 32 | 29 | 27 | 22 | 18 |
| SEP+ ATG- | 61  | 32  | 22 | 14 | 2  | 1  |    |
| SEP- ATG+ | 100 | 66  | 62 | 58 | 54 | 31 | 14 |
| SEP+ ATG+ | 174 | 116 | 75 | 29 | 4  | 1  |    |

**5 year cumulative incidence: (95%CI)**

- Statin- ATG-: 20.4% (13.2%-30.7%)
- Statin+ ATG-: 23.6% (14.4%-37.3%)
- Statin- ATG+: 7.1% (3.4%-14.2%)
- Statin+ ATG+: 9.5% (5.9%-15.1%)



Suppl. Figure 8

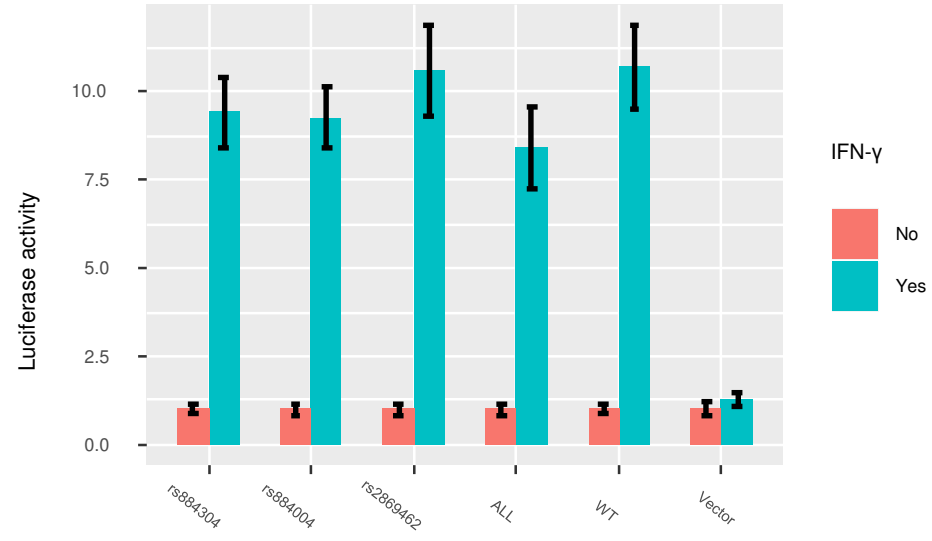

Suppl. Figure 9

Training cohort

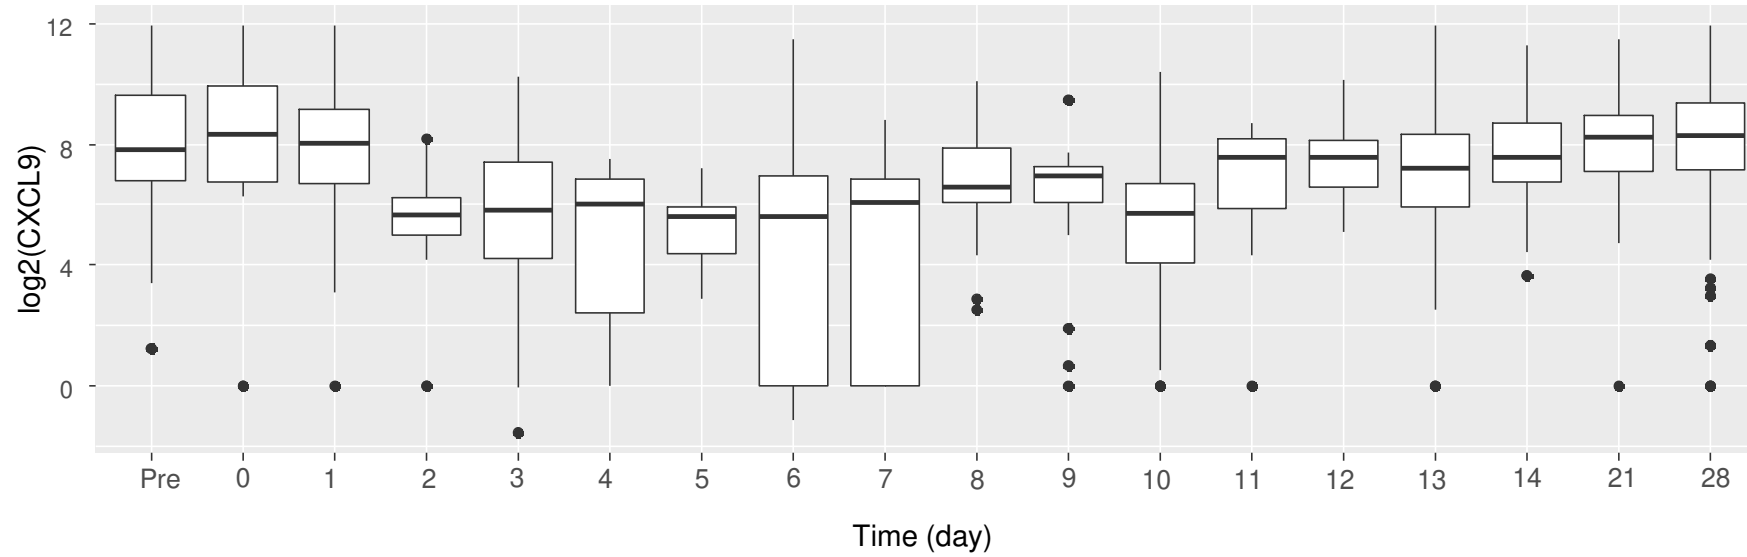

SEP cohort

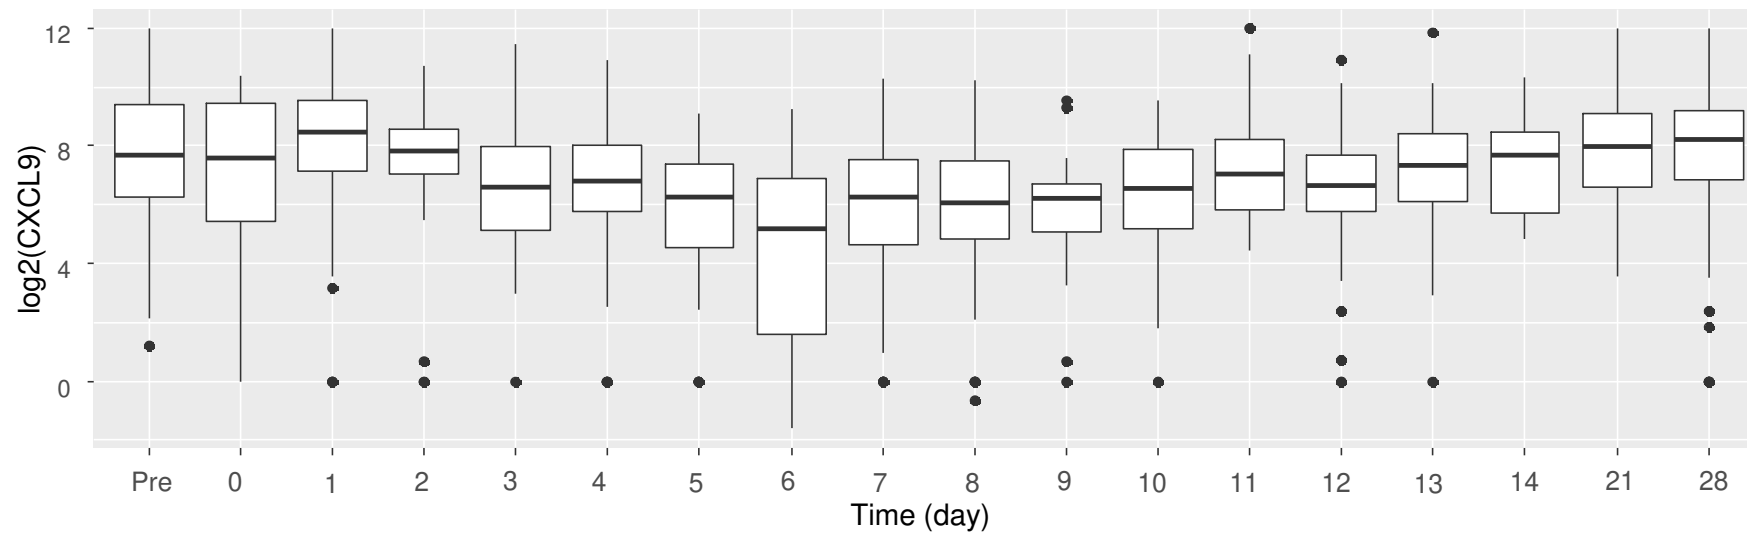

Supplement: 41408_2021_434_MOESM1_ESM.pdf [file 41408_2021_434_MOESM1_ESM.pdf]
